# Supplementary material for: Intertwined Functions of Separase and Caspase in Cell Division and Programmed Cell Death
Source: PubMed Central journal article supplement (PMC7145830; doi:10.1038/s41598-020-63081-w), 2020-04-09

# **Intertwined Functions of Separase and Caspase in Cell Division and Programmed Cell Death**

Pan-Young Jeong<sup>1</sup>, Ashish Kumar<sup>1</sup>, Pradeep Joshi<sup>1</sup>, and Joel H. Rothman<sup>1\*</sup>

## Supplemental material

### Supplemental Figure S1. Compromised SEP-1 separase function results in extra surviving nuclei

L1 larvae stained with DAPI show presence of extra nuclei (arrows) in the anterior pharynx of either *sep-1(e2406)* alone (middle panel) or in conjunction with the weak reduction of function *ced-3(n2443)* allele (bottom panel), as compared to the laboratory reference strain N2 (top panel)

### Supplemental Figure S2. *ced-3* enhances reduction of function defects of *sep-1* RNAi treated animals

(A) Embryonic lethality of embryos from parents fed with HT115 *E. coli* strain expressing dsRNA against *sep-1* (from the Ahringer RNAi library collection) diluted with bacteria carrying an empty vector. (B) % of males among the surviving progeny of L4 parents fed diluted *sep-1* RNAi bacteria.

## Supplemental movies

**Movie S1.** *ced-3(n717); ruls32*. Normal chromosome segregation in *ced-3* mutant strain expressing histone 2B-GFP fusion protein

**Movie S2.** *sep-1(e2406); ruls32*. Normal chromosome segregation in *sep-1* mutant strain expressing histone 2B-GFP fusion protein at the permissive temperature of 19.5°C.

**Movie S3.** *sep-1(e2406); ced-3(n717); ruls32*. Failure of egg shell formation and chromosome segregation at the permissive temperature of 19.5 ±0.2°C

**Movie S4** *sep-1(e2406); ced-3(n717); ruls32*. No apparent defects in either egg shell formation or chromosome segregation at 18.2 ±0.2°C

Supplementary Figures

Figure S1 Extra surviving pharyngeal cells in *sep-1(e2406)*

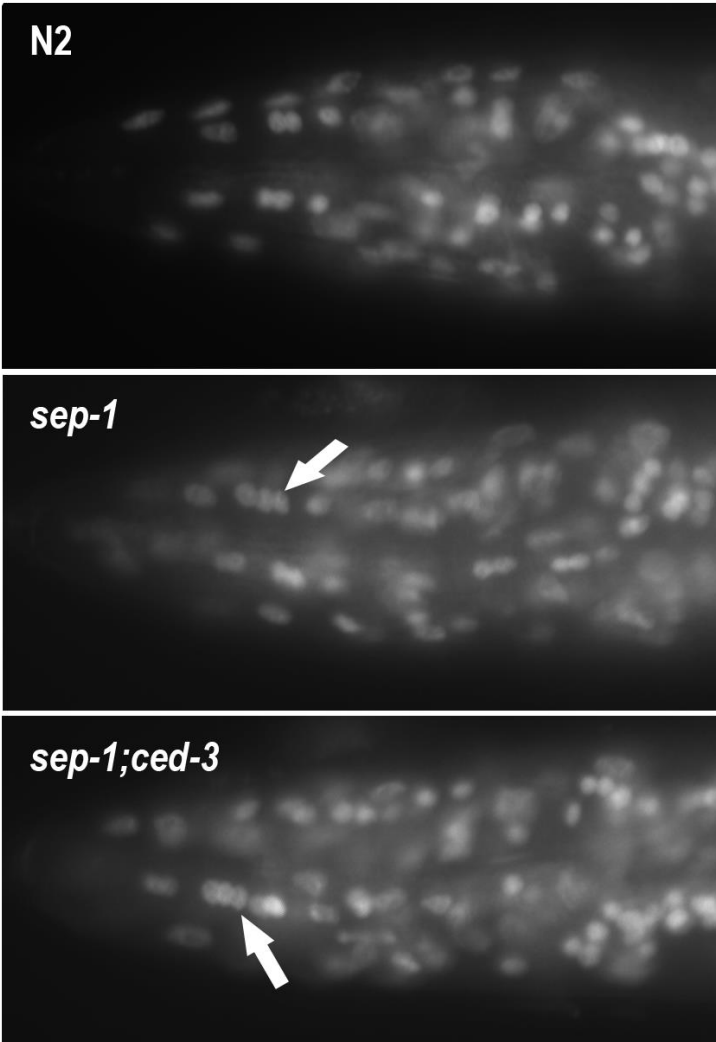

Figure S2. *ced-3* enhances reduction of function defects of *sep-1* RNAi treated animals

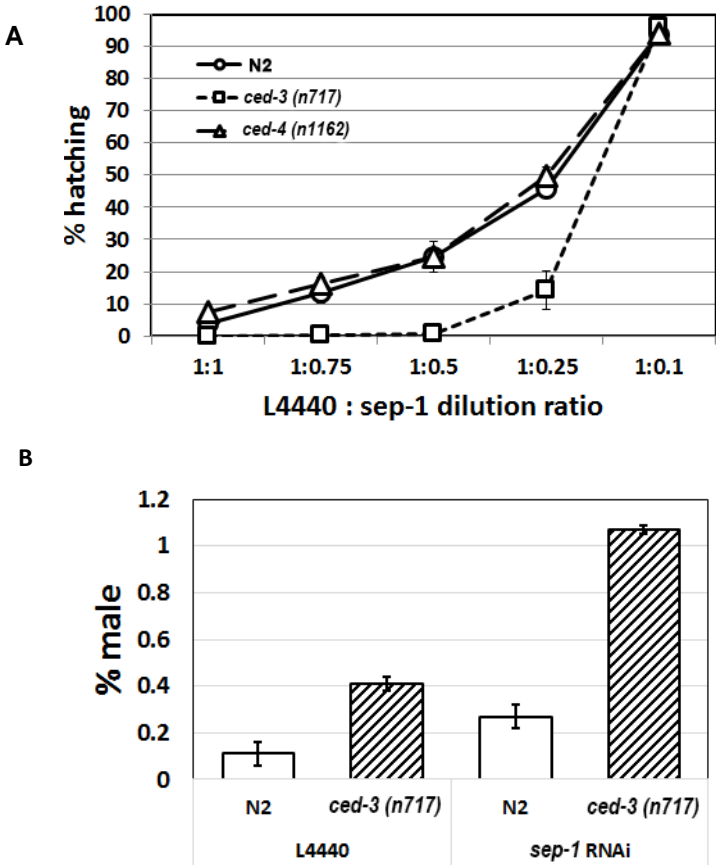

Supplement: 41598_2020_63081_MOESM1_ESM.pdf [file 41598_2020_63081_MOESM1_ESM.pdf]
